# Supplementary material for: The Construction and Validation of Child, Adolescent and Parental Decision Aids for Considering Methylphenidate Drug Holidays in ADHD
Source: MDPI journal article supplement (doi:10.3390/pharmacy6040122), 2018-11-24

# Can I take a break from my ADHD medicine?

Read this booklet with your  
parents to find out more!

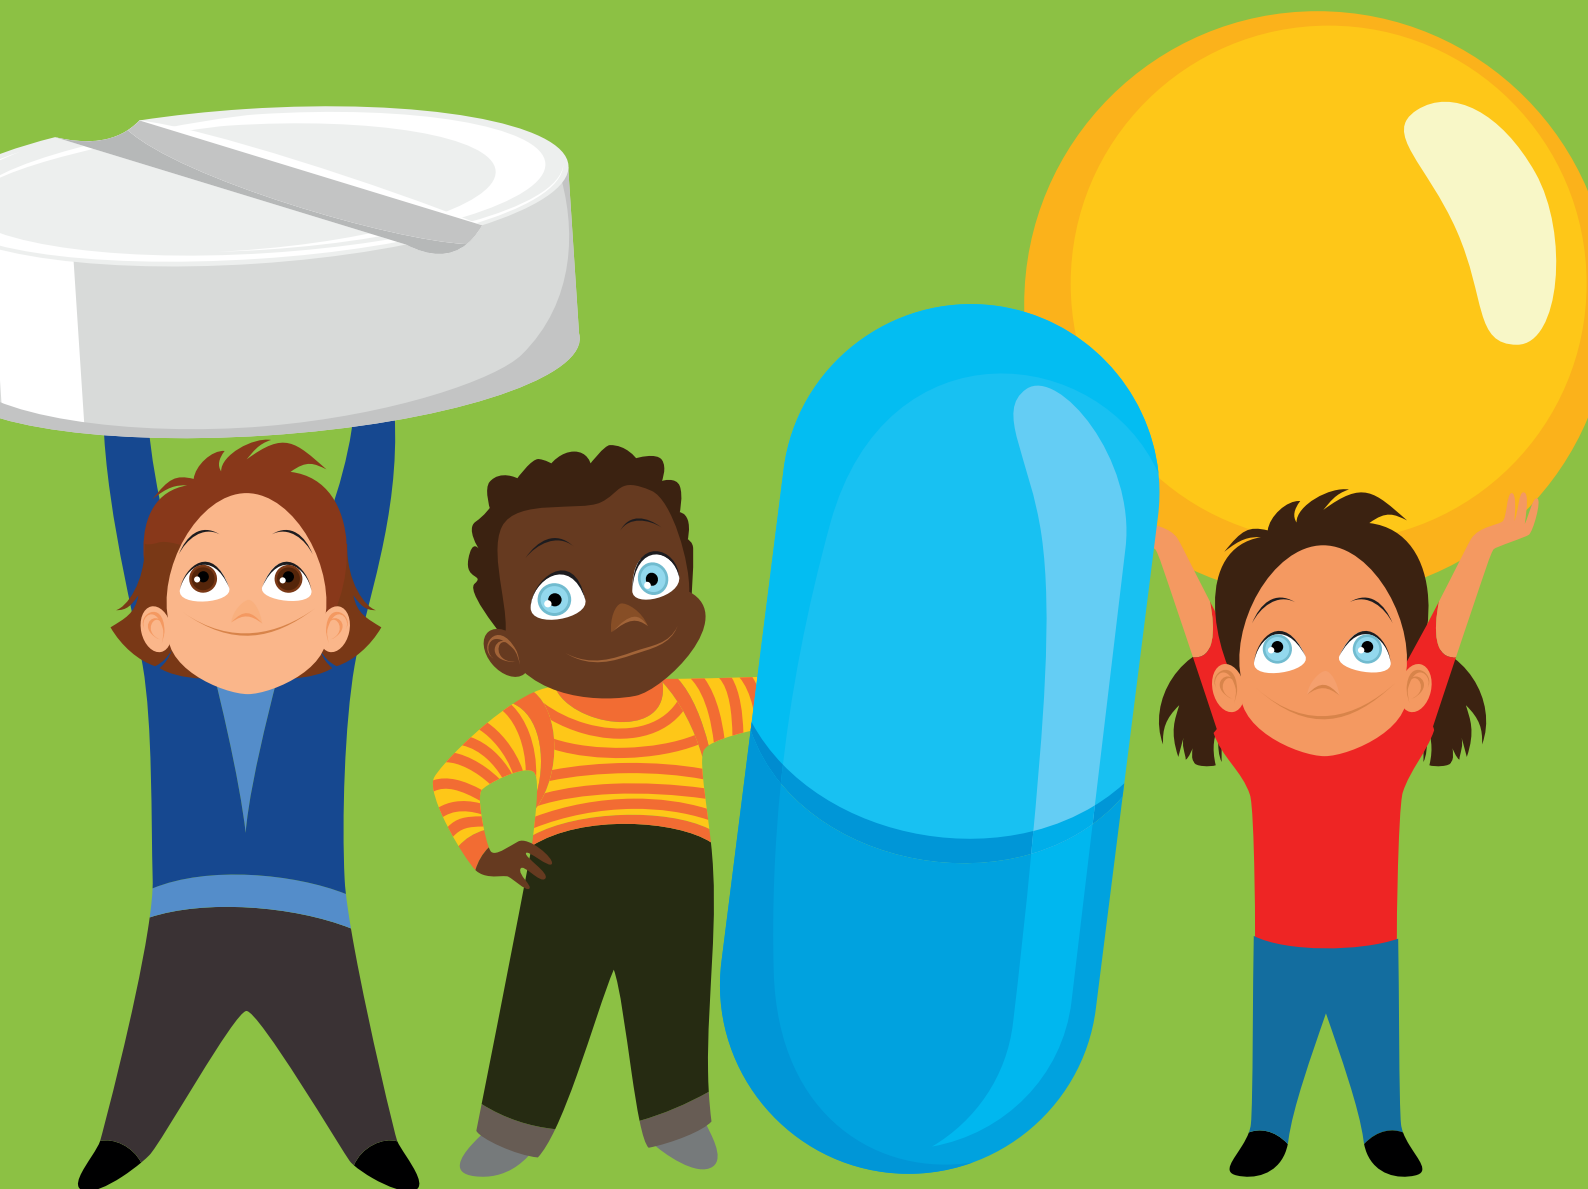

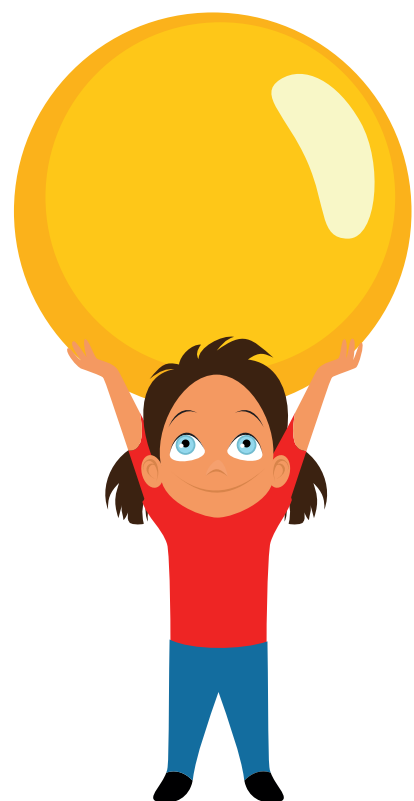

## What is this booklet for?

You take medicine for your condition which is called ADHD.

Your medicine helps you to concentrate better.

This booklet is to help you, your family and your doctor to decide about whether or not you should take a break from your ADHD medicine.

Read this booklet with your family.

If there is anything you don't understand or you have any questions, let your family know.

## Try this puzzle

Here is a word search for you to try.

It will help you learn words that will be used in this booklet.

|   |   |   |   |   |   |   |   |   |   |
|---|---|---|---|---|---|---|---|---|---|
| D | U | Z | W | S | F | Z | A | J | O |
| E | S | D | O | C | T | O | R | L | T |
| C | L | M | E | D | I | C | I | N | E |
| I | B | U | M | A | K | H | P | C | R |
| S | J | R | N | K | K | O | L | A | U |
| I | S | T | E | H | N | L | J | S | X |
| O | B | E | H | A | V | I | O | U | R |
| N | R | N | U | D | K | D | T | S | S |
| B | X | C | V | H | V | A | O | I | W |
| J | R | Q | K | D | I | Y | F | K | B |

ADHD  
BEHAVIOUR  
BREAK  
DECISION  
DOCTOR  
HOLIDAY  
MEDICINE

## Now it is time to learn about what a medicine holiday is!

Hi there! I am a doctor.  
I call a break from medicine a **planned medicine holiday**.  
I help people like you to decide if they want to take a break from their medicine.

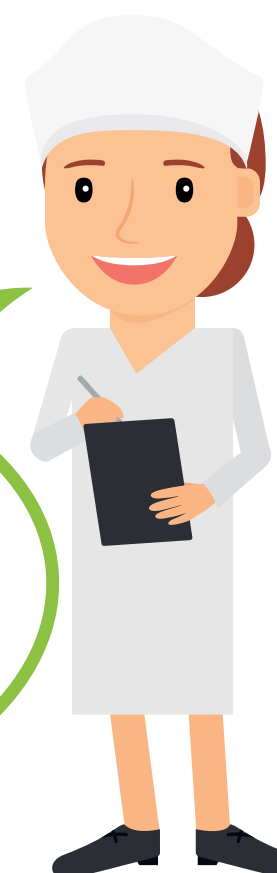

Doctors are here to help you decide about a medicine holiday as sometimes you may have problems with your medicines. You may get headaches or not feel hungry while on your ADHD medicine and therefore a break may stop these problems.

## Good things about a medicine holiday

- ✓ The break will help you stop problems caused by your medicine such as finding it hard to sleep or getting headaches.
- ✓ It has been found by scientists that ADHD medicine may reduce how tall you are going to be.
- ✓ You may need to take less medicine or even stop your medicine forever, as may no longer need it after you break. Both of these changes could help improve your growth.

## Bad things about a medicine holiday

- ✗ You may find it hard to concentrate at school or home, but this doesn't usually happen in medicine breaks because they are only for a small amount of time.

## When is the best time to have my break from medicine?

Summer holidays or school holidays are usually the best time to take a break from your medicine as it won't affect your concentration at school

## What will happen if I want to have a break from my medicine?

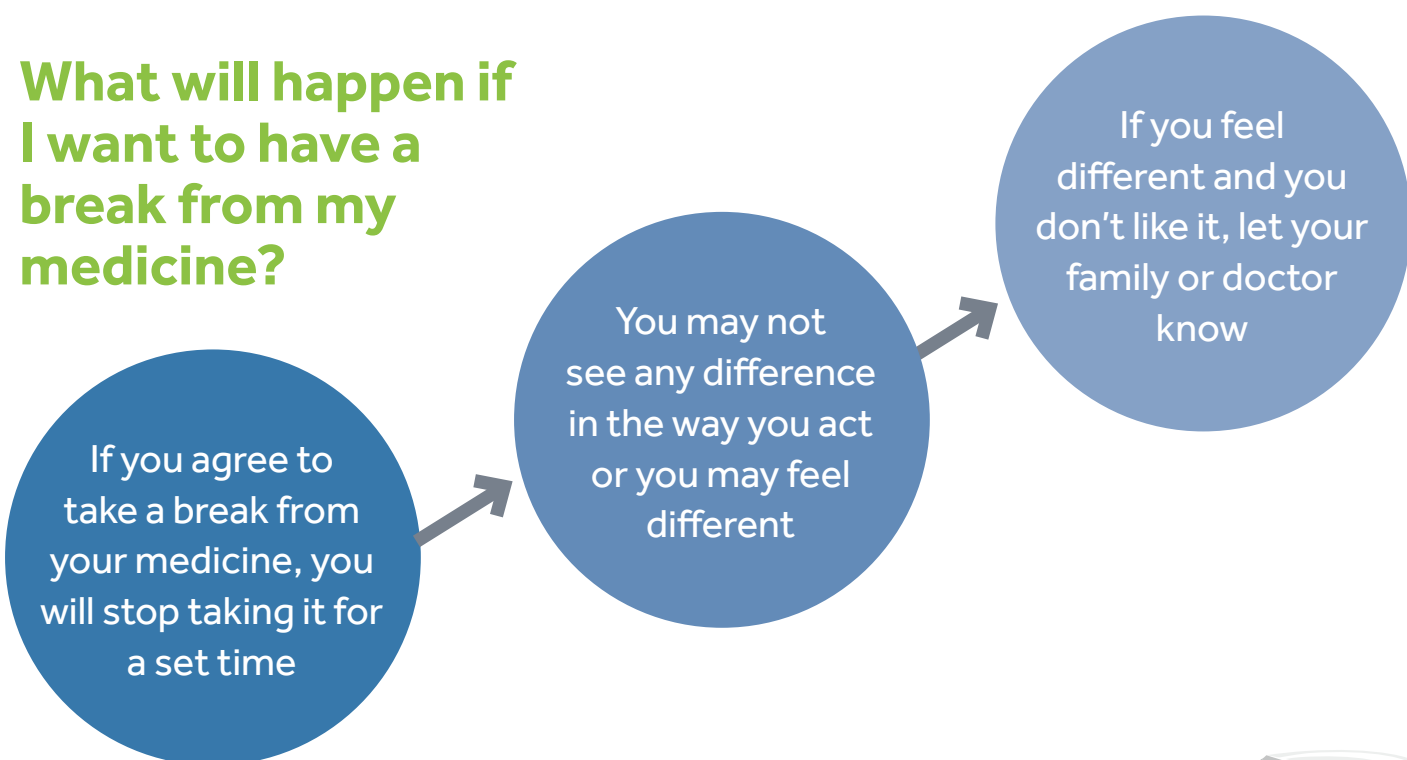

Now you have finished reading this, take a look through some questions on the next page to think about how you feel.

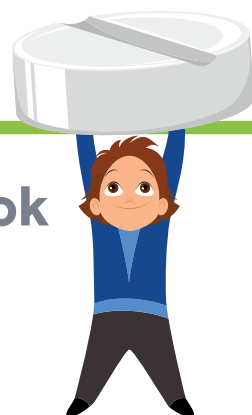

## How do you feel?

It is important that you are always happy and make the right decision for you. Read the sentences below and think about how they make you feel.

### Instructions

If you agree more with the **blue sentence** you can tick ✓ the box below the **blue smiley face**.

If you agree more with the **purple sentence** you can tick ✓ the box below the **purple smiley face**.

If you are unsure how you feel about the sentence or think they are both as important as each other, you can tick ✓ the box below the **grey smiley face**.

## Let's begin!

Reasons for wanting a break from ADHD medicine

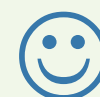

Reasons for not wanting a break from ADHD medicine

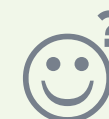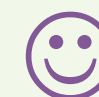

### Part 1:

I feel I do not need the medicine anymore

☐☐

Unsure

I feel I still need the medicine

☐

### Part 2:

I will be happy without my medicine

☐☐

Unsure

I will be unhappy without my medicine

☐

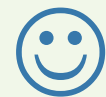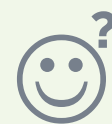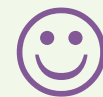

Part 3:

I am not worried about stopping the medicine for a short period of time

☐

I am worried about stopping the medicine even for a short period of time

☐

Unsure

☐

Part 4:

I may not need the medicine anymore because I am getting help at school

☐

I still need the medicine because I am not getting enough help at school

☐

Unsure

☐

Part 5:

I may not need the medicine because I am getting on well at school and enjoy it

☐

I still need the medicine because I am not doing well at school and can't concentrate without it

☐

Unsure

☐

Part 6:

My other important reasons for wanting to take **or** not wanting to take a drug holiday:

Your decision:

You have now had time to think about the facts and your feelings.

By now, you may have an idea about if you want to take a break from your medicine or not.

Show which way you are feeling right now with a tick ✓ in the box below:

I would like to try a break from my medicine

☐

Leaning towards this

I want to stay on my medicine and not have a break

☐

Undecided

☐

Leaning towards this

Speak to your family and doctor about which one you picked.

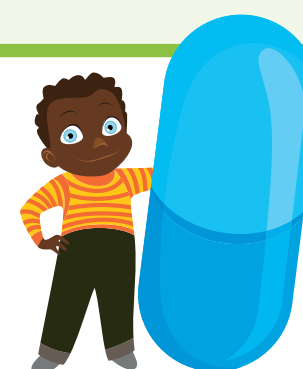

You have now finished reading the booklet. Thank you for taking the time to read it!

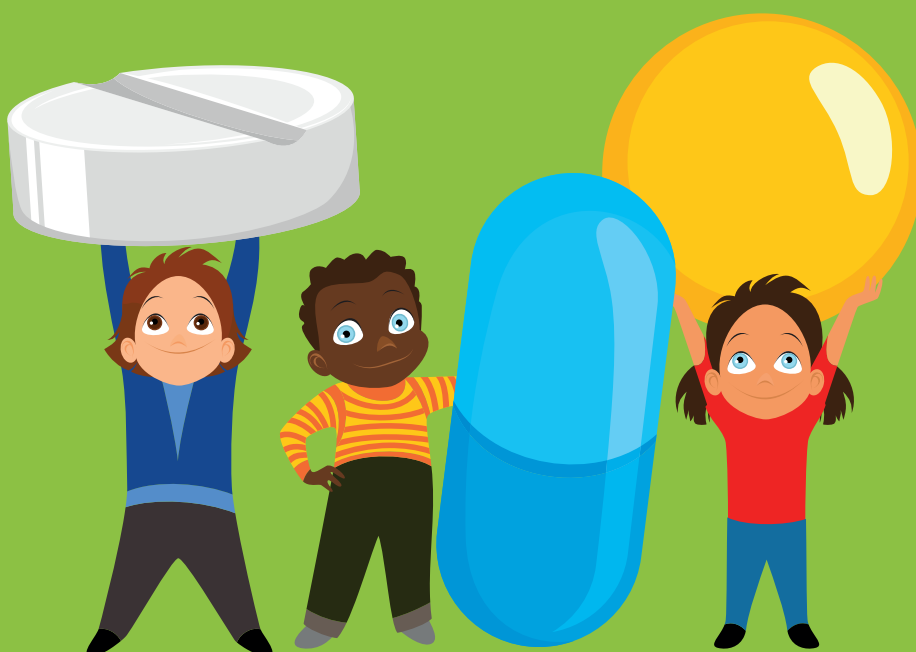

## CAN I TAKE A BREAK FROM MY ADHD MEDICINE?

 For more information, please contact:

**Dr Parastou Donyai, Division of Pharmacy Practice**

University of Reading  
Whiteknights  
Reading, RG6 6AP

[p.donyai@reading.ac.uk](mailto:p.donyai@reading.ac.uk)  
Tel (0118) 378 4704

 /theuniversityofreading  
 @UniofReading

[www.reading.ac.uk](http://www.reading.ac.uk)

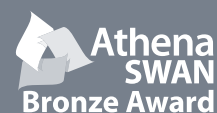

Supplement: s1 [file s1]
