# Supplementary material for: The Construction and Validation of Child, Adolescent and Parental Decision Aids for Considering Methylphenidate Drug Holidays in ADHD
Source: MDPI journal article supplement (doi:10.3390/pharmacy6040122), 2018-11-24
Supplement: s1 [file s1]

## Deciding whether or not to consider a planned drug holiday from ADHD medication: parents' guide for decision-making

**Your feelings:** Your personal feelings are just as important as the medical facts. Think about what matters most to you in this decision. Do this by reading the following statements and placing a tick on the sliding scale to show where your feelings lie.

### Examples:

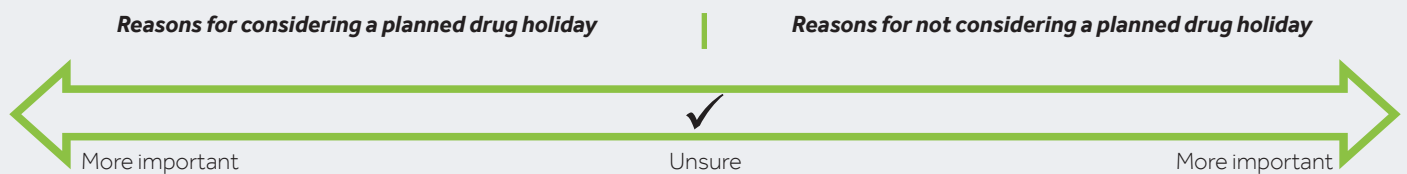

### Statement 1

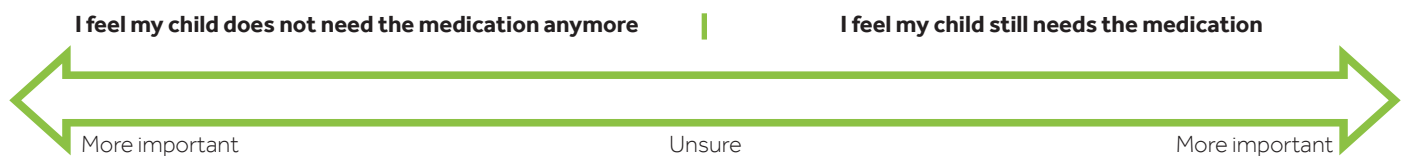

### Statement 2

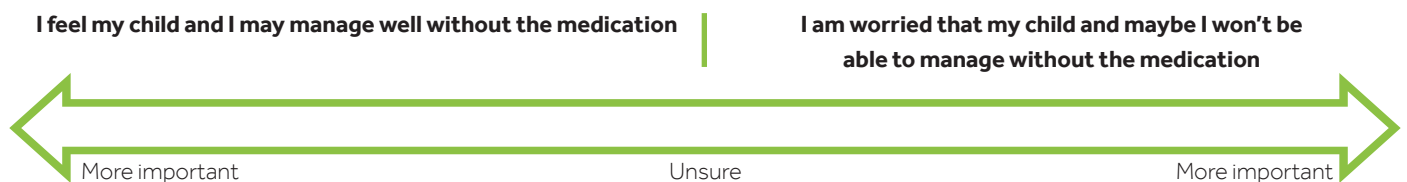

### Statement 3

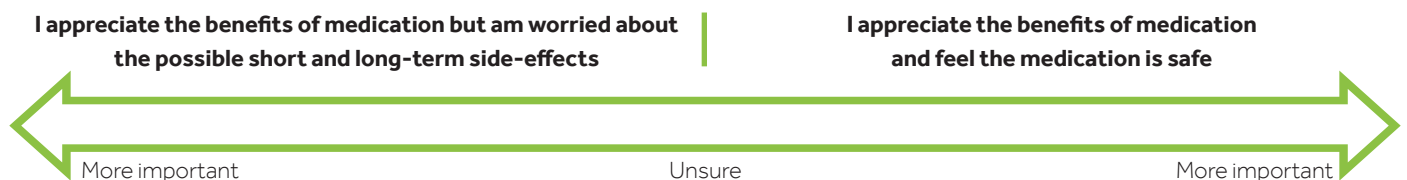

### Statement 4

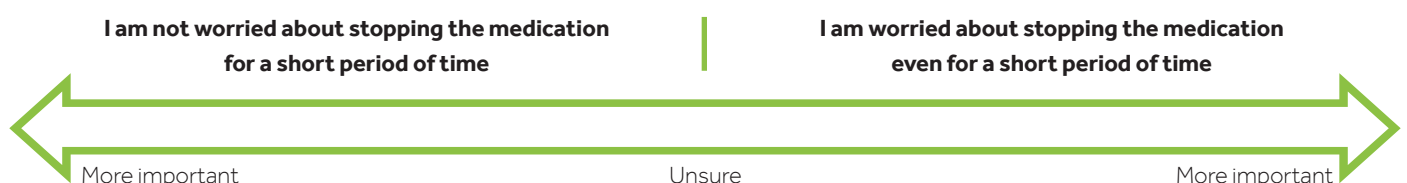

### Statement 5

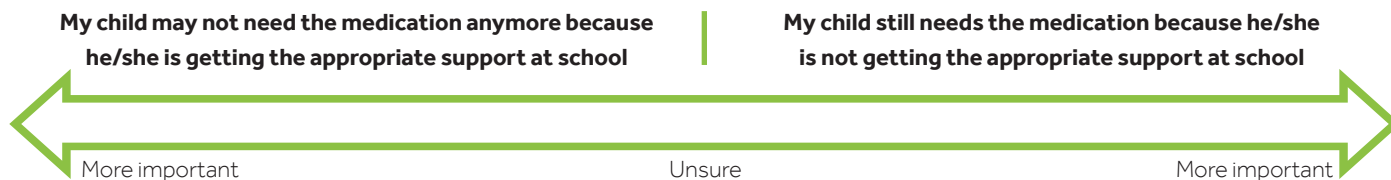

### Statement 6

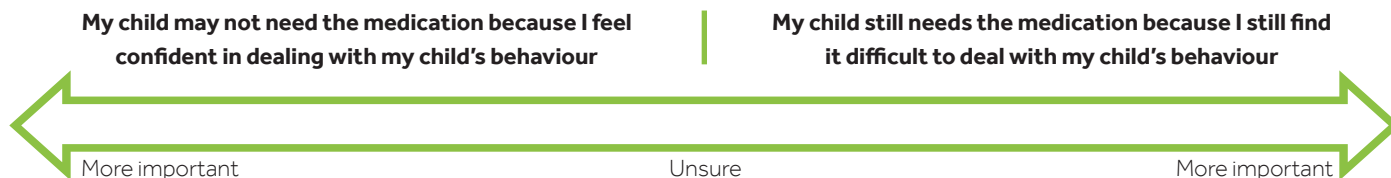

### Statement 7

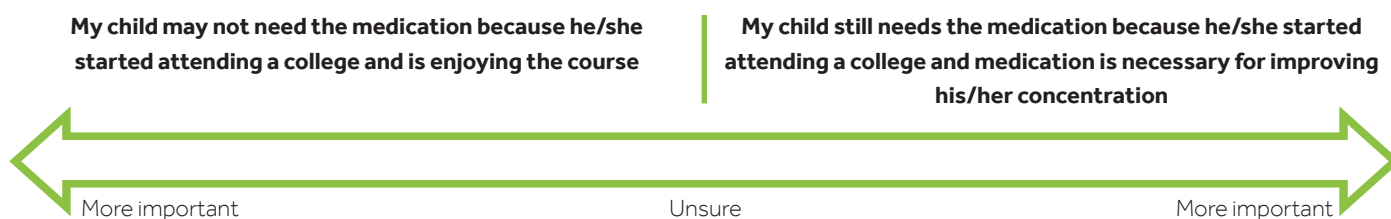

### Statement 8

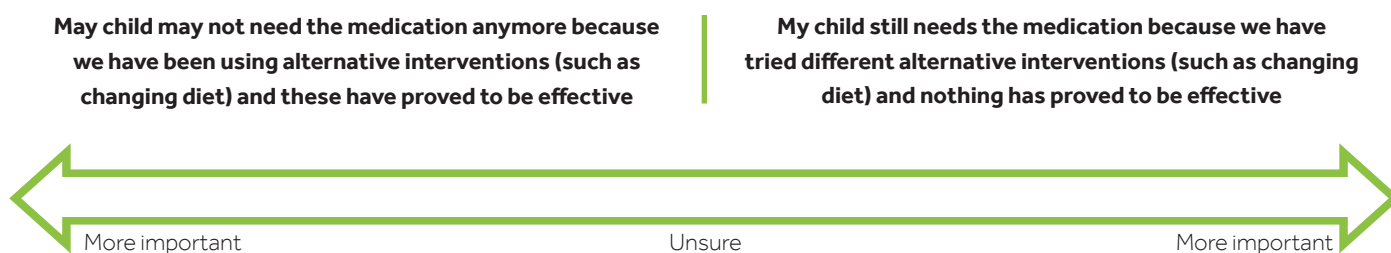

**Other important reasons.** Use this box to write down any other important reasons that matter most to you in this decision:

### Your decision:

Now that you've thought about the facts and your feelings, you may have a general idea of where you stand on this decision. Show which way you are leaning towards right now:

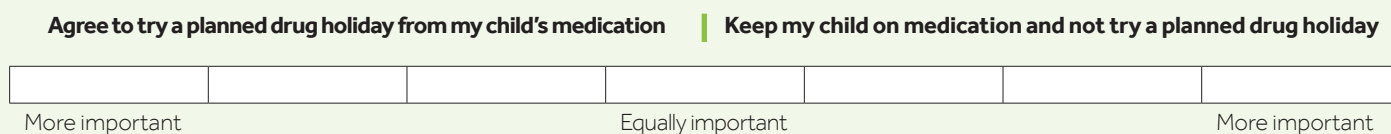

**Speak to your child's clinician about your decision and feelings.**

**You have now finished using this decision aid, thank you for your time.**
